# Supplementary material for: The challenges of using a copper fluorescent sensor (CS1) to track intracellular distributions of copper in neuronal and glial cells
Source: Royal Society of Chemistry journal article supplement (doi:10.1039/c2sc20397a), 2012-01-01
Supplement: c2sc20397a.pdf [file c2sc20397a.pdf]

## **The Challenges of Using a Copper Fluorescent Sensor (CS1) to Track Intracellular Distributions of Copper in Neuronal and Glial Cells**

Katherine A. Price<sup>1</sup>, James L. Hickey<sup>2,3</sup>, Zhiguang Xiao<sup>2,3</sup>, Anthony G. Wedd<sup>2,3</sup>, Simon A. James<sup>4</sup>, Jeffrey R. Liddell<sup>1</sup>, Peter J. Crouch<sup>1</sup>, Anthony R. White<sup>1\*#</sup> and Paul S. Donnelly<sup>2,3\*#</sup>

<sup>1</sup>Department of Pathology, The University of Melbourne, Victoria, 3010, and Mental Health Research Institute, Parkville, Victoria, 3052, Australia, <sup>2</sup>Bio21 Molecular Science and Biotechnology Institute, Parkville, Victoria, 3052, Australia, <sup>3</sup>School of Chemistry, The University of Melbourne, Victoria, 3010, Australia, <sup>4</sup>CSIRO Materials Science and Engineering, Clayton VIC, Australia and the CSIRO Preventive Health Flagship.

### **Supporting Information**

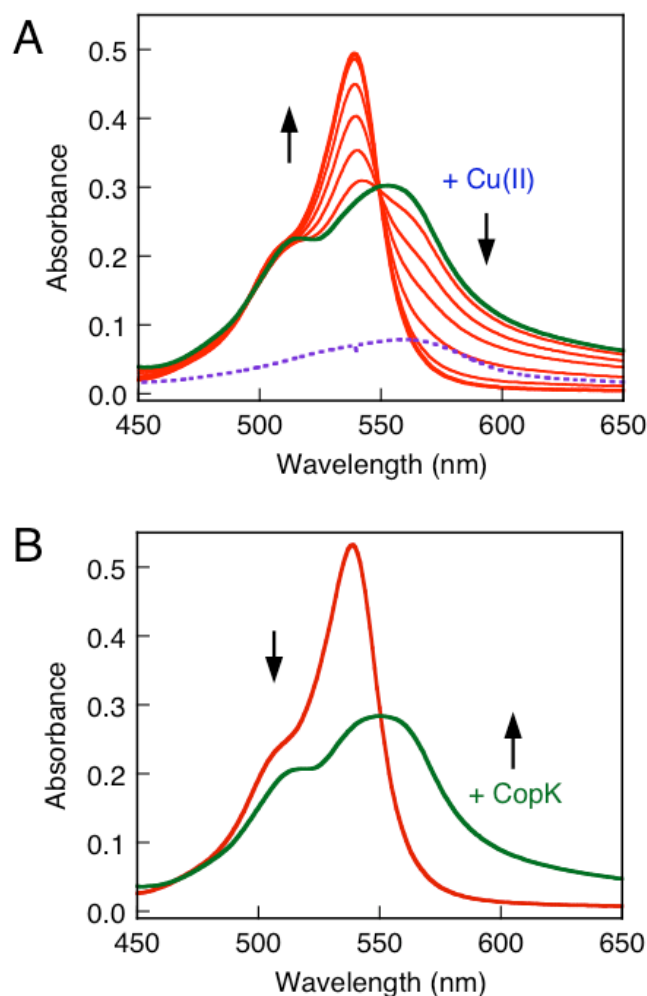

**Figure S1.** **A:** Change in solution spectrum of *apo*-CS1 (10 μM; green trace) in MOPS buffer (50 mM, pH 7.4) containing NH<sub>2</sub>OH (0.4 mM) upon titration with CuSO<sub>4</sub> (0.2, 0.4, 0.6, 0.8, 1.0, 1.2 equivalents; red traces). The purple dashed line is the spectrum of a 10 μM [Cu<sup>I</sup>(Bca)<sub>2</sub>]<sup>3-</sup> solution. **B:** Change in solution spectrum of Cu<sup>I</sup>-CS1 as generated in **A** (10 μM; red trace) upon titration with one equivalent of *apo*-CopK (green trace).

**Note:** Binding of Cu<sup>I</sup> to CS1 is characterized by an increase in the absorbance around 540 nm in the electronic spectrum (Zeng, 2006; Miller, 2006). The data in Figure A showed that, in the presence of NH<sub>2</sub>OH, the added Cu<sup>II</sup> ions are reductively trapped by CS1 quantitatively to produce Cu<sup>I</sup>-CS1. The data in Figure B indicated that CopK was able to remove Cu<sup>I</sup> quantitatively from Cu<sup>I</sup>-CS1. CopK has no absorbance in the visible spectral range and under the experimental condition, CopK binds Cu<sup>I</sup> and Cu<sup>II</sup> cooperatively with sub-picomolar affinity for Cu<sup>I</sup> ( $K_D$ ,  $\sim 10^{-13}$  M) (Chong, 2009).

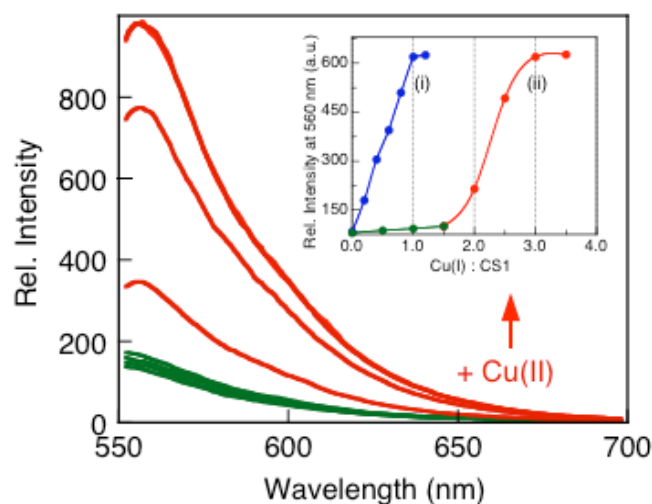

**Figure S2.** Change in fluorescence spectrum of *apo*-CS1 (2.0 μM; green trace) in MOPS buffer (50 mM, pH 7.4) containing CopK (2.0 μM) and NH<sub>2</sub>OH (0.4 mM) upon titration with CuSO<sub>4</sub>. The inset (ii) is the plot of F<sub>560</sub> versus Cu:CS1 for the titration and the insert (i) is the plot for the control titration without CopK. As noted in Figure S1B, under the experimental condition, CS1 was not able to sense the added Cu until the competing protein CopK was almost saturated with Cu<sup>I</sup> and Cu<sup>II</sup> to produce the stable species Cu<sup>I</sup>Cu<sup>II</sup>-CopK.

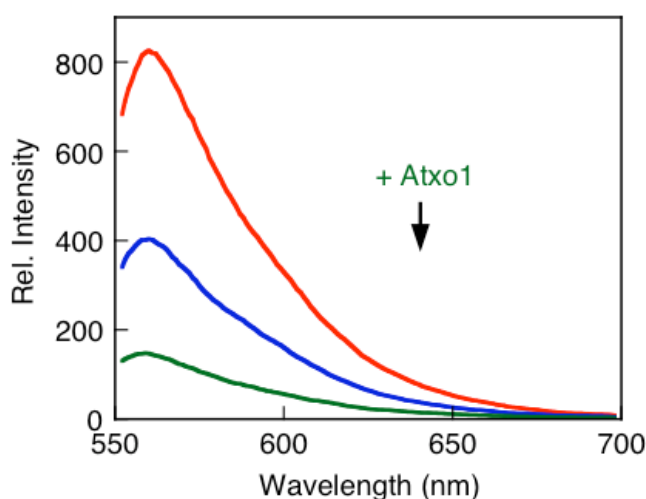

**Figure S3.** Change in fluorescence spectrum of Cu<sup>I</sup>-CS1 (2.0 μM; red trace) in MOPS buffer (50 mM, pH 7.4) containing ascorbate (1.0 mM) upon titration with *apo*-Atox1 (0.5 and 1.0 equivalent; blue and green trace, respectively). The Cu<sup>I</sup> in Cu<sup>I</sup>-CS1 was removed quantitatively by a stoichiometric amount of *apo*-Atox1. Atox1 binds one equivalent of Cu<sup>I</sup> with sub-femtomolar affinity (Xiao, 2010; 2011).

## References

Zeng L.; Miller E. W.; Pralle A.; Isacoff E. Y.; Chang C. J. *J. Am. Chem. Soc.* **2006**, 128, 10-11.

Miller E. W.; Zeng L.; Domaille D. W.; Chang C. J. *Nat. Protoc.* **2006**, 1, 824-827.

Chong L. X.; Ash M. R.; Maher M. J.; Hinds M. G.; Xiao Z.; Wedd A. G. *J. Am. Chem. Soc.* **2009**, 131, 3549-3564.

Xiao Z.; Wedd A. G. *Nat. Prod. Rep.* **2010**, 27, 768-789.

Xiao Z.; Brose J.; Schimo S.; Ackland S. M.; La Fontaine S.; Wedd A. G. *J. Biol. Chem.* **2011**, 286, 11047-11055.
